# Supplementary material for: Mesenchymal stem cells and the neuronal microenvironment in the area of spinal cord injury
Source: PubMed Central journal article supplement — Neural Regen Res. 2019 Feb;14(2):227–37. doi: 10.4103/1673-5374.244778 (PMC6301181; doi:10.4103/1673-5374.244778), 2019-02
Supplement: NRR-14-227_Suppl2.pdf [file NRR-14-227_Suppl2.pdf]

**Additional Table 2 Preclinical *in vivo* trials using MSCs transplantation after SCI and obtained results in the interpretation of the authors\***

| Cell type                           | SCI model                                                                                                                 | Activation astrocytes/glia scar                                                                                | Microglia/inflammation                                                                                                                                                                                                                                                  | Oligodendrocytes/Schwann cells                                               | Tissue retention                                                                                | Neuroprotection                                                                                           | Axonal outgrowth                                                 | Reference                               |
|-------------------------------------|---------------------------------------------------------------------------------------------------------------------------|----------------------------------------------------------------------------------------------------------------|-------------------------------------------------------------------------------------------------------------------------------------------------------------------------------------------------------------------------------------------------------------------------|------------------------------------------------------------------------------|-------------------------------------------------------------------------------------------------|-----------------------------------------------------------------------------------------------------------|------------------------------------------------------------------|-----------------------------------------|
| BM-MSCs-exosomes                    | Rat, T10, contusion, iv. injection                                                                                        | ↓ C3/GFAP – IHC (1 dpi);<br>↓ TNF- $\alpha$ , IL-1 $\beta$ , IL-6 – WB (1 dpi);<br>↓ CSS6 – IHC (28 dpi)       | ↓ CD68 – IHC (1, 28 dpi);<br>↓ TNF- $\alpha$ , IL-1 $\beta$ , IL-6 – WB (1 dpi)                                                                                                                                                                                         | –                                                                            | ↓ Lesion volumes (28 dpi)                                                                       | ↓ TUNEL-cells (1 dpi);<br>↓ Bax, casp-3, casp-9, ↑ Bcl-2 – WB (1 dpi)                                     | ↑ NF200 – IHC (1, 28 dpi), WB (1 dpi)                            | Liu et al. (2018)                       |
| AD-MSCs                             | Rat, T8, contusion, application on the top of injury at 14 dpi                                                            | ↓ GFAP – IHC, PCR-RT (74 dpi, 60 dpt)                                                                          | ↓ Iba1 – IHC, PCR-RT (74 dpi)                                                                                                                                                                                                                                           | ↑ Olig2 – PCR-RT (74 dpi);<br>↑ mpz, pmp22 – PCR-RT (74 dpi)                 | ↓ Area of abnormal cavities;<br>↑ spared tissue (74 dpi)                                        | ↑ HSP1b – PCR-RT (74 dpi)                                                                                 | –                                                                | Mukhamedshina et al. (2018)             |
| UCB-MSCs                            | Mice, T12, compression, application on the top of injury at 1 dpi                                                         | –                                                                                                              | ↑ CD11b <sup>+</sup> /CD45 <sup>+</sup> – FACS (9dpi);<br>↑ TNF- $\alpha$ , Arginase I – PCR-RT (9 dpi); ↑ CCL2 – ELISA (3 dpi)                                                                                                                                         | ↑ Myelin sparing (35 dpi)                                                    | –                                                                                               | ↑ Safety motor neurons (35 dpi)                                                                           | –                                                                | Caron et al. (2016), Papa et al. (2018) |
| BM-MSCs                             | Rat, ischemia by balloon occlusion of the thoracic aorta, ia. injection                                                   | –                                                                                                              | ↓ The ratio of Bax to Bcl-2, ↑ TNF- $\alpha$ ,<br>↓ TNFRSF1A – PCR-RT (1 dpi)                                                                                                                                                                                           | –                                                                            | ↑ The area of vacuolation (1 dpi)                                                               | ↓ TUNEL-large neuron cells (1 dpi)                                                                        | –                                                                | Takahashi et al. (2018b)                |
| AD-MSCs; BM-MSCs                    | Mice, T9–10, contusion, is. injection at 3 dpi                                                                            | –                                                                                                              | –                                                                                                                                                                                                                                                                       | –                                                                            | –                                                                                               | ↑ CD31 (only in AD-MSCs group) – IHC (1, 2 wpt)                                                           | ↑ PKC $\gamma$ axons (only in AD-MSCs group) – IHC (2, 4, 6 wpt) | Takahashi et al. (2018a)                |
| UCB-MSCs                            | Rabbits, T6–7, 7-day compression, iv. injection at 1 dpi post decompression and repeated injection with 3–7 day intervals | ↓ GFAP – IHC (8 wpt)                                                                                           | ↓ Iba-1 – IHC (8 wpt)                                                                                                                                                                                                                                                   | –                                                                            | –                                                                                               | ↓ TUNEL-cells (8 wpt)                                                                                     | ↑ NF-200 – IHC (8 wpt)                                           | Yang et al. (2018)                      |
| WJ-MSCs                             | Rat, T8, compression, it. injection at 7 dpi or repeated injection with 7 day intervals                                   | ↓ GFAP in dose-depend manner – IHC (9 wpi)                                                                     | ↓ Irf5, CD86, Mrc1, Cd163 in case repeated injection 1,5 mil cells – PCR-RT (9 wpi)                                                                                                                                                                                     | –                                                                            | ↑ White matter sparing, ↑ gray matter sparing in case repeated injection 1, 5 mil cells (9 wpi) | ↑ Casp3 – PCR-RT (9 wpi)                                                                                  | ↑ GAP43 in dose-depend manner – IHC (9 wpi)                      | Krupa et al. (2018)                     |
| BM-MSCs                             | Mice, T9, compression, iv. or ip. injection at 7 dpi                                                                      | –                                                                                                              | –                                                                                                                                                                                                                                                                       | ↑ Number of myelinated fibers, ↑ myelin area – toluidine blue (8 wpt)        | ↑ Spared white matter – (8 wpt)                                                                 | ↑ BDNF, NGF, NT-3, NT-4 – IHC (8 wpt);                                                                    | ↑ Axon area, ↑ fiber area, ↑ g-ratio – toluidine blue (8 wpt)    | Ramalho et al. (2018)                   |
| UCB-MSCs-exosomes                   | Mice, T11–12, contusion, iv. injection at 30 mpi                                                                          | –                                                                                                              | ↓ The ratio of F4/80 <sup>+</sup> /iNOS <sup>+</sup> cells, ↑ F4/80 <sup>+</sup> /Arg1 <sup>+</sup> cells, ↓ the total number of macrophages – IHC (7 dpi);<br>↓ TNF- $\alpha$ , IL-6, IFN- $\gamma$ , G-CSF, MCP-1, MIP-1 $\alpha$ , ↑ IL-4, IL-10 – Milliplex (2 dpi) | –                                                                            | ↓ Cavity volume – (8 wpi)                                                                       | –                                                                                                         | –                                                                | Sun et al. (2018)                       |
| BM-MSCs-Exosomes                    | Rat, T10, contusion, iv. injection at 3 hpi                                                                               | ↓ GFAP – IHC (14 dpi)                                                                                          | ↓ CD32, CD86, CD200R, CD163, RT1B – FC (14 dpi);<br>↓ Iba1 – IHC (14 dpi)                                                                                                                                                                                               | –                                                                            | –                                                                                               | –                                                                                                         | –                                                                | Ruppert et al. (2018)                   |
| BM-MSCs                             | Tree shrews, T10, hemisection, is. injection at 9 dpi                                                                     | ↓ GFAP – IHC (28 dpi)                                                                                          | ↓ IL-1b – IHC (28 dpi);<br>↑ Merk, PI3K – PCR-RT (28 dpi)                                                                                                                                                                                                               | –                                                                            | ↑ Spared tissue (28 dpi)                                                                        | ↓ TUNEL-cells (28 dpi);<br>↑ area of the soma in motoneurons (28 dpi);<br>↑ CNTF, STAT3 – PCR-RT (28 dpi) | –                                                                | Xiong et al. (2017)                     |
| BM-MSCs                             | Rat, T10, transection with removing 1.5–2 mm segment, insertion of scaffolds                                              | –                                                                                                              | ↓ CD68, TNF- $\alpha$ /CD68, IL-1 $\beta$ /CD68 – IHC (1 wpi)                                                                                                                                                                                                           | –                                                                            | ↓ Cavity formation (8 wpt)                                                                      | ↑ vWF – IHC (1 wpi)                                                                                       | ↑ nerve fibers (NF, GAP-43) – IHC (4 wpt)                        | Zeng et al. (2011, 2016)                |
| AD-MSCs                             | Dog, L1, compression, iv. injection once a day for 3 successive days                                                      | ↑ GFAP – WB (7 dpi);<br>↓ pSTAT3 – WB (7 dpi)                                                                  | ↓ COX-2, IL-6, TNF- $\alpha$ – WB (7 dpi)                                                                                                                                                                                                                               | ↑ GalC – WB (7 dpi)                                                          | ↓ Hemorrhagic area (7 dpi);<br>↓ damaged lesion size (7 dpi)                                    | ↓ 3-NT, 4-HNE, PC – ELISA (7 dpi);<br>↑ $\beta$ -tubulin – WB (7 dpi)                                     | –                                                                | Kim et al. (2015)                       |
| BM-MSCs                             | Mice, T11–12, contusion, is. injection                                                                                    | ↑ GFAP – IHC (28 dpi)                                                                                          | ↑ Iba1, ↑ arginase-1 – IHC (28 dpi);                                                                                                                                                                                                                                    | –                                                                            | ↓ Lesion volumes (28 dpi)                                                                       | ↑ Laminin – IHC (28 dpi)                                                                                  | –                                                                | Neirinckx et al. (2015)                 |
| BM-MSCs                             | Rat, T10, compression, it. injection at 7 dpi                                                                             | ↓ and ↑ GFAP in central and peripheral part of injury, respectively – IHC (1 wpt);<br>↑ GFAP – PCR-RT (28 dpi) | ↑ Irf5, Mrc1, ↓ Nfkb1 – PCR-RT (28 dpi);<br>↓ TNF- $\alpha$ , IL-4, IL-1 $\beta$ , IL-2, IL-6, IL-12, ↑ MIP-1 $\alpha$ (10–28 dpi),<br>↑ RANTES (14 dpi) – Milliplex                                                                                                    | ↑ Olig2 – PCR-RT (28 dpi)                                                    | ↑ Spared white and gray matter (1 wpt)                                                          | ↑ VEGFa, Sort1, CNTF, ↑ FGF2, ↑ casp-3 – PCR-RT (28 dpi)                                                  | ↓ GAP-43 – IHC (1 wpt);<br>↑ GAP-43 – PCR-RT (28 dpi)            | Urdzková et al. (2014)                  |
| BM-MSCs                             | Rat, T8–9, contusion, iventr. injection at 1, 2, 4 wpi                                                                    | ↓ GFAP – IHC (4 wpt)                                                                                           | –                                                                                                                                                                                                                                                                       | ↑ Schwann cells associated with axons in the astrocyte-devoid lesion (4 wpt) | ↓ Cavity volume (4 wpt)                                                                         | –                                                                                                         | ↑ Axon density (NF200) – IHC (4 wpt)                             | Nakano et al. (2013)                    |
| AD-MSCs; BM-MSCs; WJ-MSCs; UCB-MSCs | Dog, L1, compression, is. injection at 1 wpi                                                                              | ↓ GFAP – WB (8 wpt)                                                                                            | ↓ COX-2, IL-6 – ELISA (8 wpt)                                                                                                                                                                                                                                           | ↓ Demyelinated areas (8 wpt)                                                 | ↓ lesion size (8 wpt)                                                                           | ↑ Tuj1, NF160, NeuN, GALC – WB (8 wpt)                                                                    | –                                                                | Ryu et al. (2012)                       |
| BM-MSCs                             | Rat, T9–10, contusion, is. injection at 3 dpi                                                                             | –                                                                                                              | ↓ OX-42/iNOS/CD16, ↑ OX-42/arginase-1/CD206 – IHC (7 dpi);<br>↑ CD45 <sup>+</sup> /CD11b <sup>+</sup> /GR-1 – FC (7 dpi);<br>↓ TNF- $\alpha$ , IL-6, ↑ IL-4, IL-13 – WB & ELISA (7 dpi)                                                                                 | ↑ Myelinated areas (5 wpi)                                                   | ↓ Total cavitation area (5 wpi)                                                                 | –                                                                                                         | ↑ GAP-43 <sup>+</sup> , RT97 <sup>+</sup> -fibers (5 wpi)        | Nakajima et al. (2012)                  |

\*The table includes the data for research articles over the period of 2011–2018, where the efficacy of transplantation of MSCs or their exosomes in a model of SCI was evaluated under two or more criteria specified in the table. The shading shows the criteria for which there is data in the relevant articles. MSCs: Mesenchymal stem cells; SCI: spinal cord injury; dpi & dpt/wpi & wpt: days/weeks post injury and transplantation; respectively; hpi/mpi: hours or minutes post injury; ↑: increase; ↓: decrease; ↕: no significant changes; is.: intraspinal; iv.: intravenous; iventr.: intraventricular; it.: intrathecal; ip.: intraperitoneal; ia.: intraarterial injections.
